# Supplementary material for: The Structure-Activity Relationship of Pterostilbene Against Candida albicans Biofilms
Source: PubMed Central journal article supplement (PMC6155180; doi:10.3390/molecules22030360), 2017-02-27
Supplement: molecules-22-00360-s001.pdf [file molecules-22-00360-s001.pdf]

**Table S1.** SMIC80 and structure of the analogues of PTE.

| Name | Structure                                                                           | SMIC <sub>80</sub> (μg/ml) |                |
|------|-------------------------------------------------------------------------------------|----------------------------|----------------|
|      |                                                                                     | Biofilm formation          | Mature biofilm |
| C11  | 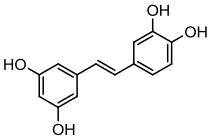   | >64                        | >512           |
| C12  |    | >64                        | >512           |
| C13  |    | >64                        | >512           |
| C14  |   | >64                        | >512           |
| C15  |  | >64                        | >512           |
| C16  |  | >64                        | >512           |
| C17  |  | >64                        | >512           |
| C18  |  | >64                        | >512           |
| C19  |  | >64                        | >512           |
| C10  |  | >64                        | >512           |

|     |                                                                                   |     |      |
|-----|-----------------------------------------------------------------------------------|-----|------|
| C20 | 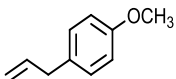 | >64 | >512 |
| C21 |  | >64 | >512 |
| C22 |  | >64 | >512 |

**Table S2.** The rate of hyphal formation after treatment of PTE and analogues.

| Name | RPMI 1640 |      |      |      |      |      | Spider |      |      |      |      |      |
|------|-----------|------|------|------|------|------|--------|------|------|------|------|------|
|      | 0         | 4    | 8    | 16   | 32   | 64   | 0      | 4    | 8    | 16   | 32   | 64   |
| PTE  | 99.7      | 91   | 49.3 | 0    | 0    | 0    | 97     | 82.6 | 32.5 | 0    | 0    | 0    |
| C4   | 99.7      | 84.2 | 62.2 | 50.1 | 1    | 0    | 97     | 77.3 | 54.3 | 17.9 | 0    | 0    |
| C1   | 99.7      | 98.7 | 92   | 90   | 83.1 | 80.5 | 97     | 97.2 | 95   | 89.5 | 85   | 83.6 |
| C2   | 99.7      | 95   | 90.3 | 91   | 77.7 | 35.7 | 97     | 34.7 | 13   | 10.3 | 12.7 | 5.7  |
| C3   | 99.7      | 93   | 83.4 | 74.8 | 59.3 | 47.5 | 97     | 43.3 | 25.7 | 15.7 | 13   | 7    |
| B1   | 99.7      | 99   | 100  | 97   | 97.3 | 94   | 97     | 100  | 98.7 | 96   | 91.2 | 87   |
| B2   | 99.7      | 98   | 90.9 | 94.1 | 97.3 | 77.1 | 97     | 100  | 98.5 | 97.3 | 93.6 | 89   |
| C5   | 99.7      | 97   | 95.6 | 91.6 | 86.1 | 83   | 97     | 89.4 | 80.7 | 54.4 | 39.5 | 6    |
| C6   | 99.7      | 95.4 | 86.1 | 48.7 | 15   | 0    | 97     | 12.5 | 10   | 2    | 0    | 0    |
| B3   | 99.7      | 94.5 | 79   | 20.5 | 3    | 0    | 97     | 23.3 | 5    | 0    | 0    | 0    |
| C7   | 99.7      | 88.9 | 82.5 | 35.6 | 32.7 | 4    | 97     | 57.9 | 40.5 | 35   | 33.7 | 13   |
| B4   | 99.7      | 100  | 94.2 | 90   | 91.7 | 88   | 97     | 93   | 95.9 | 92   | 89.2 | 84   |
| B6   | 99.7      | 78.3 | 70.9 | 22   | 0    | 0    | 97     | 15   | 11   | 3    | 0    | 0    |
| B5   | 99.7      | 98.3 | 90   | 68.8 | 29   | 13   | 97     | 93   | 89.2 | 51.2 | 16   | 1    |
| C8   | 99.7      | 98.6 | 94.5 | 90.6 | 87.9 | 83.1 | 97     | 99.3 | 94.4 | 95   | 90.1 | 80.5 |
| C9   | 99.7      | 99.7 | 100  | 89.4 | 83.2 | 79.1 | 97     | 86.4 | 65.1 | 71.3 | 67.2 | 37.2 |

1. The rate of hyphal formation (%) = (the number of cells with hyphal  $\geq 40 \mu\text{m}/100$ )\*100

2. Concentration:  $\mu\text{g}/\text{ml}$
